# Supplementary material
Source: PubMed Central journal article supplement (PMC6205458)
Supplement: pnas.1806268115.sapp.pdf [file pnas.1806268115.sapp.pdf]

## SI Methods

**Strains, media, and oligonucleotides used in this study.** All genetic work was performed in a *MATa ku80-Δ* NHEJ-deficient background derived from *K. lactis* CBS2359 (1, 2) and in a *MATa his3Δ1 leu2Δ0 lys2Δ0 ura3Δ0* background of *S. cerevisiae* (BY4741) (3). Other yeast species used were obtained from the ARS Culture Collection (NRRL) in Peoria, IL, including *K. marxianus* Y-8281, *K. nonfermentans* Y-27343, *Ko. pastoris* Y-1603, *Ko. pseudopastoris* Y-27603, and *Lachancea waltii* Y-8285. *Lachancea thermotolerans* Y-8284 was provided by Gilles Fischer. For growth experiments in *S. cerevisiae* using BY4741-derived strains, a synthetic complete (SC) defined medium lacking uracil was used to maintain the pRS426 vector and its derivatives. The basic growth medium contained 5g/L ammonium sulfate, 1.72g/L yeast nitrogen base, 2g/L synthetic drop-out mix minus uracil, and 20g/L glucose (all reagents from US Biological Life Sciences). The same medium was used for *K. lactis* growth experiments, except the drop-out mix contained uracil. The rich, undefined YPD medium contained 10g/L yeast extract, 20g/L peptone, and 20g/L glucose (all reagents from US Biological Life Sciences). A complete list of strains and oligonucleotides used can be found in Supporting Tables 1 and 2.

***Kluyveromyces lactis* targeted gene replacement.** The *KanMX4* cassette was amplified from the PCR template pUG6 (4) and fused to 250-bp PCR products directly flanking the gene of interest on both sides using splicing-by-overlap extension PCR. Oligonucleotides were purchased from Integrated DNA Technologies and can be found in Table S2. The resulting PCR products were electroporated into *K. lactis* using an Eppendorf Eporator and electroporation cuvettes with a 0.2cm gap width. Preparation of electrocompetent cells was performed as described previously, but without HEPES buffer in the pre-electroporation incubation step (1). Cells were plated directly onto YPD following electroporation and grown overnight at 30°C before replica plating onto YPD plates containing 200 mg/L G418 (US Biological Life Sciences). Complementation of mutants was performed by amplifying the complete intergenic regions surrounding the coding sequences (CDS) of interest, fused to 250-bp PCR products directly flanking the *KIURA3* gene, followed by electroporation, overnight growth at 30°C and replica plating onto SC plates containing 1 g/L 5'-FOA and 50 mg/mL additional uracil (US Biological Life Sciences). Constitutive gene expression of *PUL1* and *PUL2* was performed by cloning each CDS flanked by the *EgTEF1* (also known as *MX*) promoter-terminator pair into the multiple cloning site of pIL68, a vector containing a replication sequence functional in *K. lactis* (5), followed by transformation into the appropriate strain and selection on SC plates lacking uracil.

***Saccharomyces cerevisiae* targeted gene replacement.** The *KanMX4* cassette was amplified from the PCR template pUG6 (4) using oligonucleotides containing 40bp of homology immediately upstream and downstream the CDS of the target gene. Cells were transformed using standard lithium acetate/ssDNA chemical transformations (6), and selected on YPD plates containing 200 mg/L G418. Complementation of mutants was performed by amplifying the complete intergenic regions surrounding the CDS of interest using oligonucleotides with 40bp of homology at the 5'-end to the *SmaI* site of pRS426, followed by co-transformation with *SmaI*-digested pRS426 (7) and selection on SC plates lacking uracil.

**Pulcherriminic acid extraction.** Extraction of pulcherriminic acid was performed similarly to classic protocols (8), with a few modifications. A strain of *Metschnikowia* sp., yHQL305, isolated from leaves from the Standish-Hickey State Recreational Area in California using established protocols (9), was grown to saturation in 50mL minimal medium with 2% (w/v) glucose and 100μM FeCl<sub>3</sub>. The whole culture was treated with 50% (w/v) KOH to reach a final concentration of 5%(w/v) KOH. The mixture was centrifuged at 1,800xg for 10 minutes at 20°C to remove cellular debris and precipitate iron. 45mL of cleared supernatant was transferred to a fresh container, to which 100μL 3.3M FeCl<sub>3</sub> was added, followed by 5.5mL of concentrated (36.5-38%) HCl to neutralize the KOH and reduce the pH to approximately 1.

Pulcherrimin typically precipitated at this step, but an overnight incubation at 4°C was sometimes required. The mixture was centrifuged at 1,800xg for 10 minutes at 20°C to pellet the pulcherrimin, which was then washed with 1M HCl, dH<sub>2</sub>O, and finally 100% ethanol. The pulcherrimin was then allowed to completely dry before weighing. Pulcherriminic acid was re-dissolved to the desired concentration by adding the proper amount of 5% (w/v) KOH, centrifuging the insoluble iron, and transferring the cleared supernatant to a fresh container; aliquots were then stored at -20°C for future experiments.

**Growth experiments and PA-treatment.** Growth experiments were performed in 96-well plates on a FLUOstar Omega plate reader (BMG Labtech). Experiments using only *S. cerevisiae* and *K. lactis* were performed at 30°C, while experiments using several yeast species were performed at 22°C to permit the growth of species that prefer cooler temperatures. For *K. lactis* experiments, cells were precultured in YPD overnight, OD was normalized across all cultures using fresh YPD, and cells were added to individual wells at a final OD of 0.05. For *S. cerevisiae* experiments, cells were precultured in SC without uracil overnight, OD was normalized across all cultures using fresh SC without uracil, and cells were added to individual wells at a final OD of 0.05. OD<sub>595</sub> readings were measured over the course of 40-48 hours at 15- or 30-minute intervals and normalized against corresponding uninoculated wells. For PA-treated SC medium, pulcherriminic acid in 5% KOH was added to the medium to a final concentration of 20µM in SC medium (with or without uracil), followed by addition of 0.9 equivalents of 1M HCl. Conditions lacking PA treatment were treated with a blank 5% KOH solution, followed by addition of 0.9 equivalents 1M HCl. Ferric iron supplementations were performed by the addition of FeCl<sub>3</sub> (VWR Life Science) to 20µM to demonstrate that PA-treatment was ineffective if excess iron was supplemented (Figure S5C).

**Multi-species growth experiments.** For comparisons of species that contain or lack *PUL3* and *PUL4*, two species from each of five genera were selected; species containing both genes are listed first, while those lacking *PUL3* or both genes are listed second: *Saccharomyces cerevisiae* and *Saccharomyces mikatae*; *Kluyveromyces marxianus* and *Kluyveromyces nonfermentans*; *Lachancea thermotolerans* and *Lachancea waltii*; *Metschnikowia fructicola* and *Metschnikowia bicuspidata*; *Komagataella pastoris* and *Komagataella pseudopastoris*. For growth assays of multiple species, cells were precultured in YPD for two days at room temperature, individual wells were inoculated at a dilution of 2µl culture per 150µL final volume. OD<sub>595</sub> readings were measured over the course of 40-48 hours at 15- or 30-minute intervals and normalized against corresponding uninoculated wells.

**Analysis of growth curve data.** Growth data from plate reader experiments was analyzed using the grofit package in R under the ‘logistic’ model of growth (10). For instances of negligible growth, grofit was unable to calculate parameters for a logistic growth model; therefore, the spline-fitted values were used for these instances. Where technical replicates were performed on a single plate, the median values were used for the biological replicate. Values described in the Results section are mean values of at least three biological replicates. Representative growth curves used in figures were the biological replicates that most closely resembled the mean maximum growth rates and lag times of the three (or more) biological replicates. Growth curve plots were generated using ggplot2 in R (11). Statistical comparisons of growth rates and/or lag phase durations generated in grofit were performed using paired Student’s t-tests for a minimum of three biological replicates. All paired comparisons were grown concurrently on the same plate using the same reagents. For the multi-species statistical test, mean growth rate ratios of PA-treated:untreated SC media for three biological replicates of each species were compared between the two groups (containing *PUL3* and *PUL4* vs. lacking *PUL3* or both). A paired Student’s t-test was performed, using species paired within each genus.

**BLAST search for *PUL* gene homologs outside Saccharomycotina.** Amino acid sequences from *K. lactis* (NC\_006039.1) for the *PUL1-4* genes were used as query sequences with BLASTp using default parameters against the GenBank non-redundant (nr) protein sequence database. The results of this manuscript represent searches performed on August 16, 2017. Corresponding nucleotide sequences were extracted for each protein entry via the CDS-linked entry.

**Analysis of gene neighborhoods.** From the list of BLAST hits for *PUL* gene homologs, nucleotide accession numbers were obtained using NCBI's Entrez Programming Utilities. This list of accession numbers was then used to obtain GFF3 files for their corresponding nucleotide sequences. From here, only lines pertaining to coding sequences were extracted, and redundant CDS entries for multi-exon genes were removed. Five CDS preceding and following the BLAST-derived homolog entry were extracted, and protein sequences for these genes were obtained from NCBI's Batch Entrez. To identify *PUL* gene homologs that might have been missed in initial BLAST searches, a local blast database was created using these sequences, and all sequences were searched against this database. These BLAST networks were visualized using cytoscape (12), and networks containing *PUL* gene homologs were extracted for further use. Gene clusters containing homologs of all four *PUL* genes are shown in Figure S10.

**Sequence alignment and phylogeny construction** The whole-genome phylogeny was constructed from the concatenated alignment of 1,037 BUSCO genes. Bootstrap supports for the phylogeny obtained from the super-alignment of BUSCO genes were calculated with the MPI version of ExaML (13) under the per-site rate category model (PSR) and with the memory saving option enabled. For the individual *PUL* gene phylogenies, nucleotide sequences for each of four genes in the *PUL* cluster were translated, and amino acid multiple sequence alignments were constructed using MAFFT (14), MUSCLE (15), and T-Coffee (16). Resulting alignments were trimmed using trimAl (17) v1.2 with the “-strict” option on, and all other options set to default. Phylogenies were constructed using RAxML (18) v.8.1.20, first identifying the best model using “PROTGAMMAAUTO.” The best maximum likelihood tree was obtained from twenty maximum likelihood searches, and 1,000 standard bootstrap replicates were performed. Trees were visualized for figure generation in FigTree (19) v.1.4.3.

**Topology testing.** For Approximately Unbiased (AU) tests, all reasonable tree topologies were generated using all possible rearrangements of the individual genera represented in the gene alignment. When genera were not monophyletic in the maximum likelihood tree (e.g. *Zygorulaspota* spp.), they were split up, and when subtrees containing multiple genera had bootstrap support values greater than 70 (e.g. *Candida auris* and *Metschnikowia*, *Lachancea thermotolerans* and *Kluyveromyces*), these were kept together to keep the numbers of tested trees manageable. Constrained ML trees were constructed in RAxML using the “-g” option to supply a corresponding phylogenetic tree file. Per-site likelihoods were calculated in RAxML, and one-sided Kishino-Hasegawa (KH) tests (20) and AU tests were performed using CONSEL (21) v.1.20. Significance of the resulting *p*-values were determined using a Bonferroni-correction of  $p < 0.05$  for 12 alignments ( $p < 4.1 \times 10^{-3}$ ). KH test results, AU test results, and an explanation of these results can be found in Table S3.

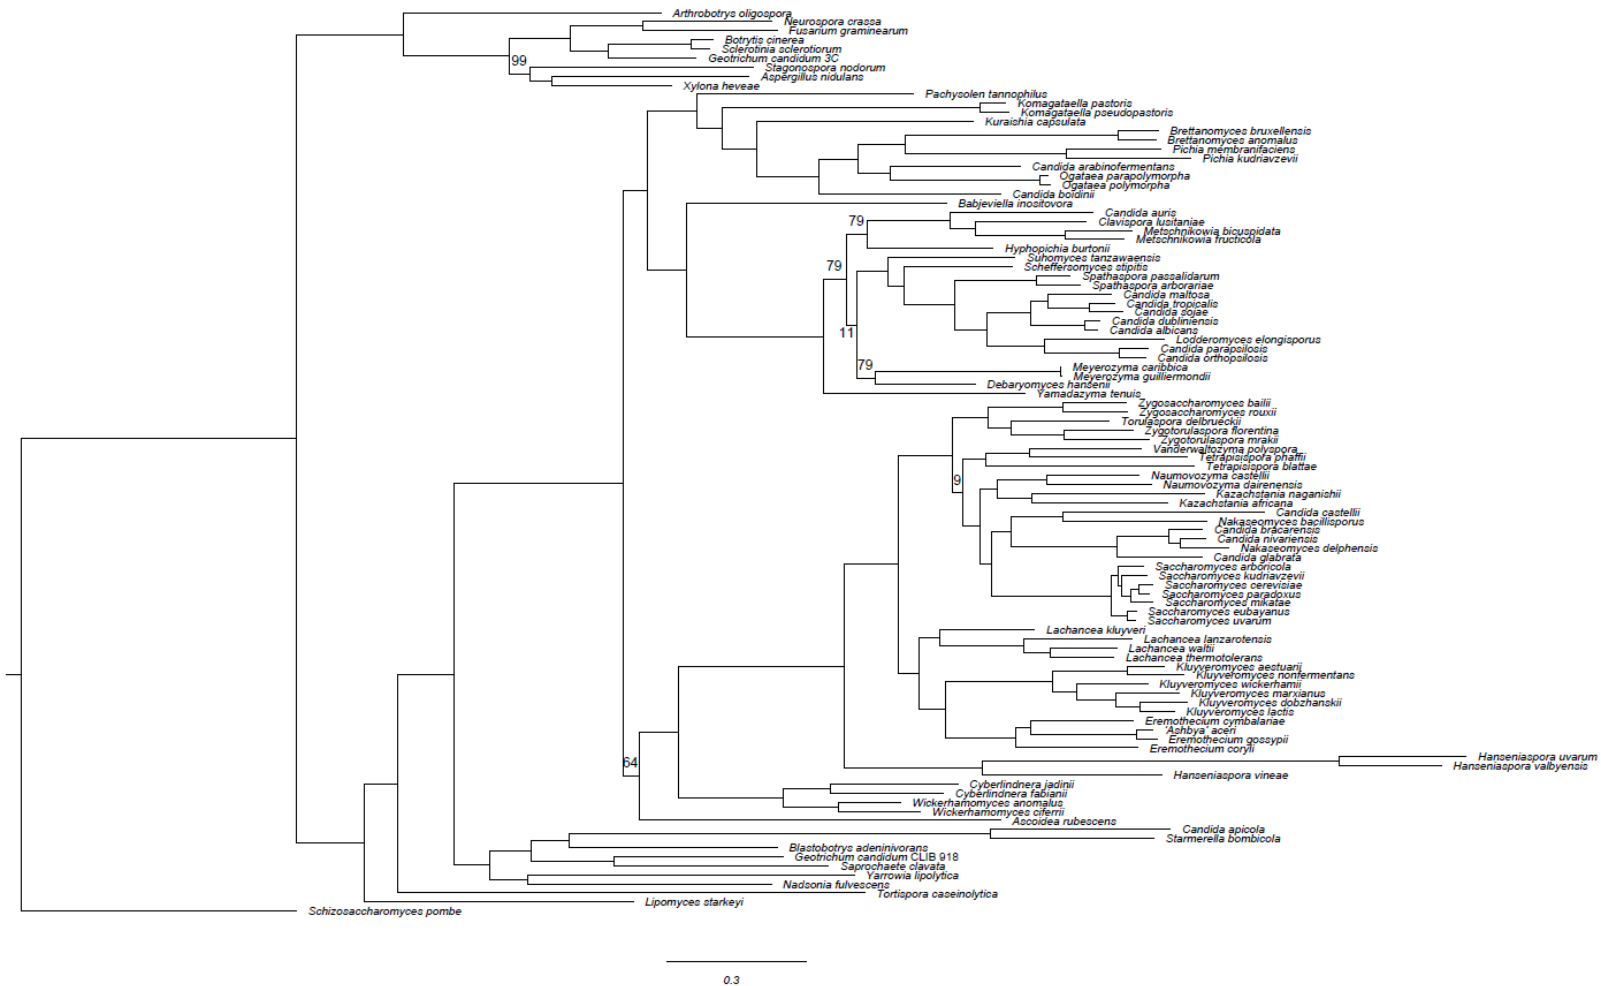

Supporting Figure 1 – Complete BUSCO maximum likelihood phylogeny from Figure 1 without collapsed nodes, with branch lengths and bootstrap support values from 100 replicates. The tree was constructed from a concatenated nucleotide alignment of 1,037 BUSCO genes containing 741,755 positions and 100 taxa using RAXML v.8.2.9. Bootstrap supports for the phylogeny obtained from the super-alignment of BUSCO genes were calculated with the MPI version of ExaML (12) under the per-site rate category model (PSR) and with the memory saving option enabled. All nodes have bootstrap support values of 100, except those labeled. Poorly supported nodes do not involve the four newly sequenced species, and alternative topologies are discussed more thoroughly in a recent comprehensive phylogenomic study (21).

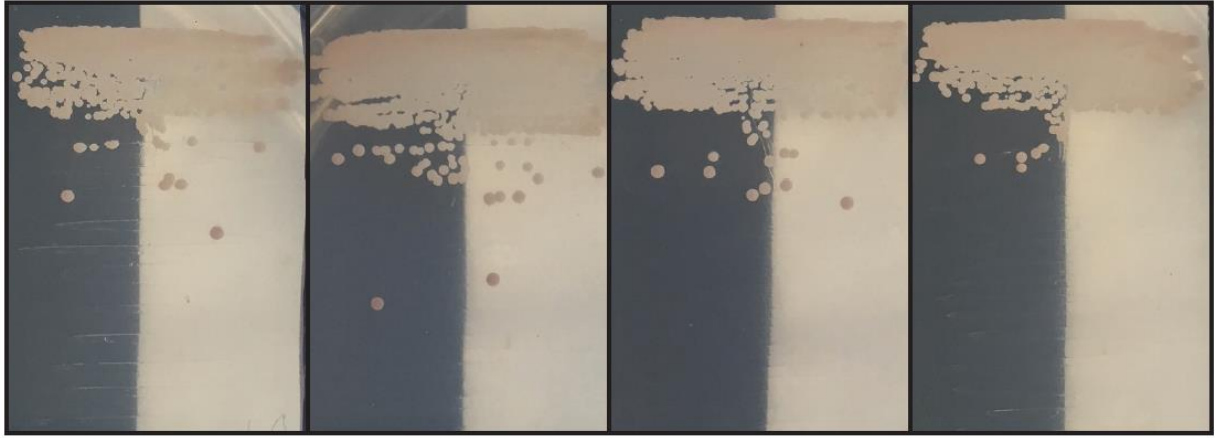

*pul1* $\Delta$ ::*KanMX*   *pul2* $\Delta$ ::*KanMX*   *pul3* $\Delta$ ::*KanMX*   *pul4* $\Delta$ ::*KanMX*  
*ura3* $\Delta$ ::*PUL1*   *ura3* $\Delta$ ::*PUL2*   *ura3* $\Delta$ ::*PUL3*   *ura3* $\Delta$ ::*PUL4*

Figure S2 – Complementation of *pul* gene replacement strains were performed by integrating the wild-type gene into the *URA3* locus of *K. lactis*. All complemented strains turn red on synthetic complete medium.

*pul2Δ [pIL68-PUL1]*

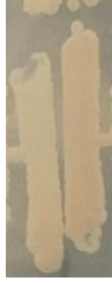

*pul1Δ [pIL68-PUL2]*

*pul4Δ [pIL68-PUL1]*

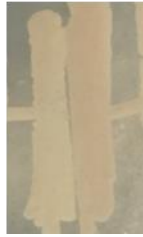

*pul4Δ [pIL68-PUL2]*

Figure S3 – Cross-feeding experiments were performed by patching a colony of each genotype nearby to one another on SC medium. Strains expressing *PUL1* are on the left and stay white during growth, while strains expressing *PUL2* are on the right and turn pink during growth. Note that, absent this cross-feeding, neither *pul1Δ*, *pul2Δ*, nor *pul4Δ* strains produce pigment (Figure 2A).

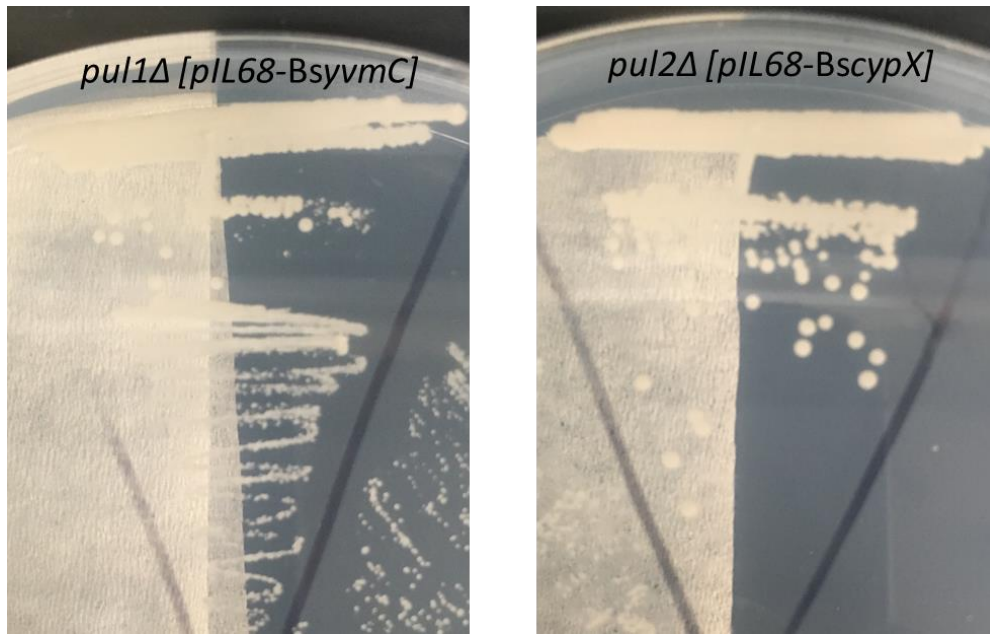

Figure S4 – *K. lactis* pulcherrimin biosynthesis mutants expressing pulcherrimin biosynthesis genes from *Bacillus subtilis*. Left – *pul1Δ* mutant expressing BsyvmC. Right – *pul2Δ* mutant expressing BscypX. Neither strain shows restoration of pigmentation.

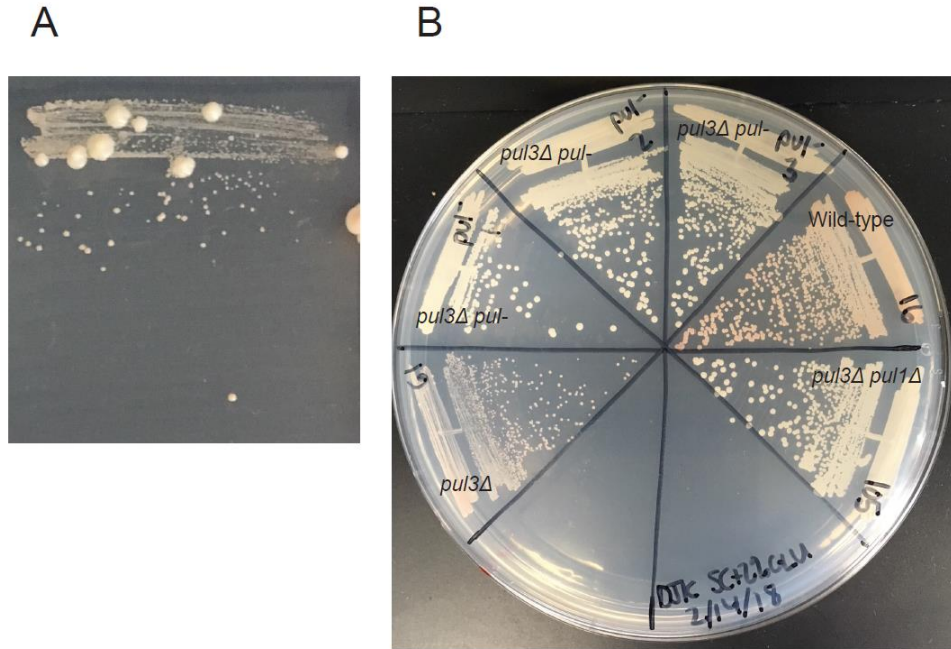

Figure S5 – A) *pul*<sup>-</sup> suppressors forming on SC in the *pul3Δ* mutant. B) The large white *Pul*<sup>-</sup> colonies from (A) were re-streaked onto SC agar plates and grew normally without pulcherrimin production. Counterclockwise from bottom left: *pul3Δ*; *pul3Δ* suppressor-1; *pul3Δ* suppressor-2; *pul3Δ* suppressor-3; wild-type *K. lactis*; *pul3Δ pul1Δ*.



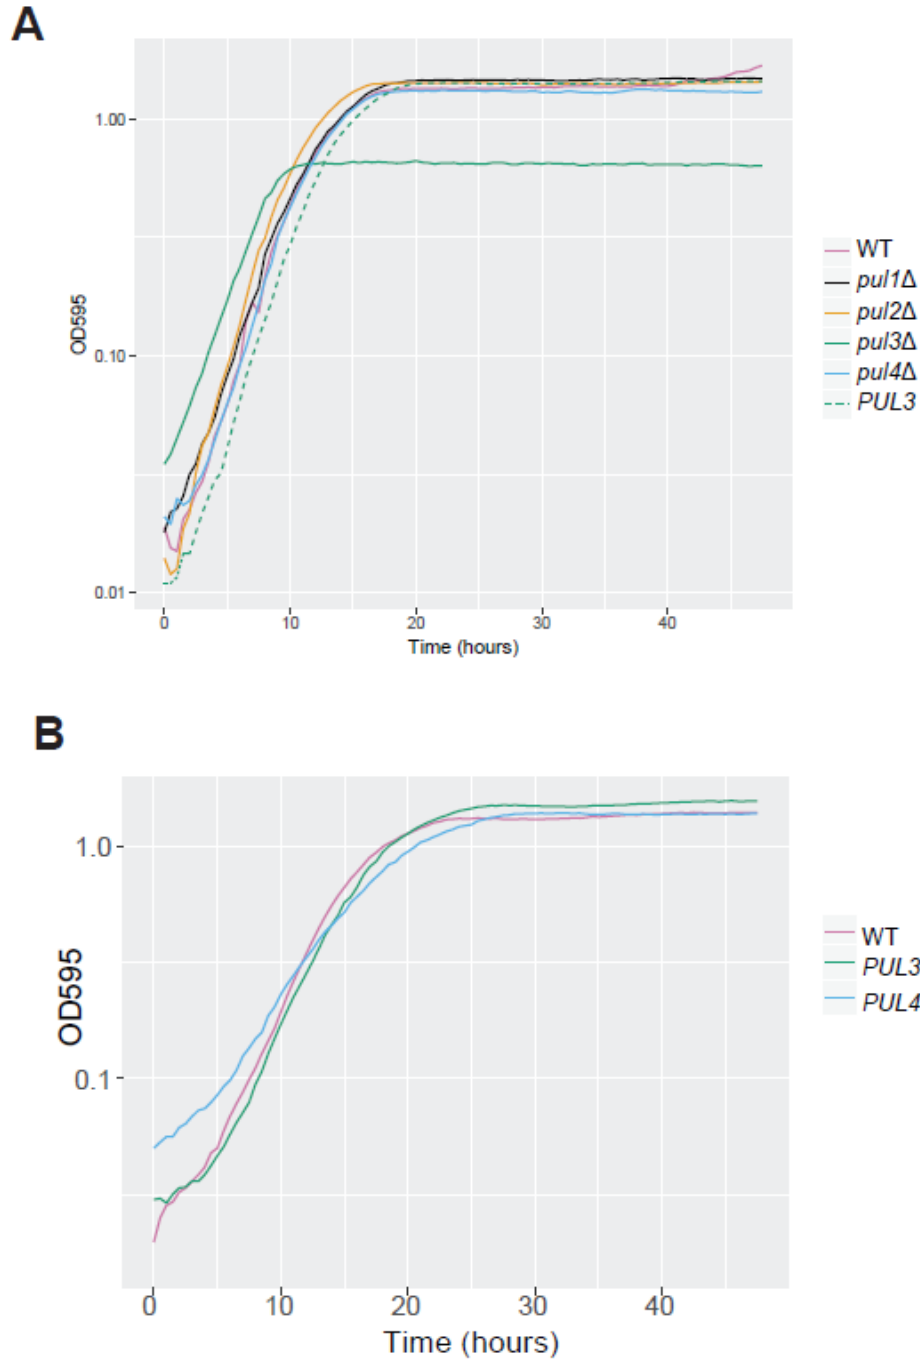

Figure S6 – A) Representative growth curves of *K. lactis pul* mutants in synthetic complete medium without addition of pulcherriminic acid. The *PUL3* strain is a *pul3*Δ *ura3*Δ::*PUL3* strain complemented with the wild-type *PUL3* gene. B) Growth of *K. lactis* complemented *pul* mutant strains in PA-treated SC medium.

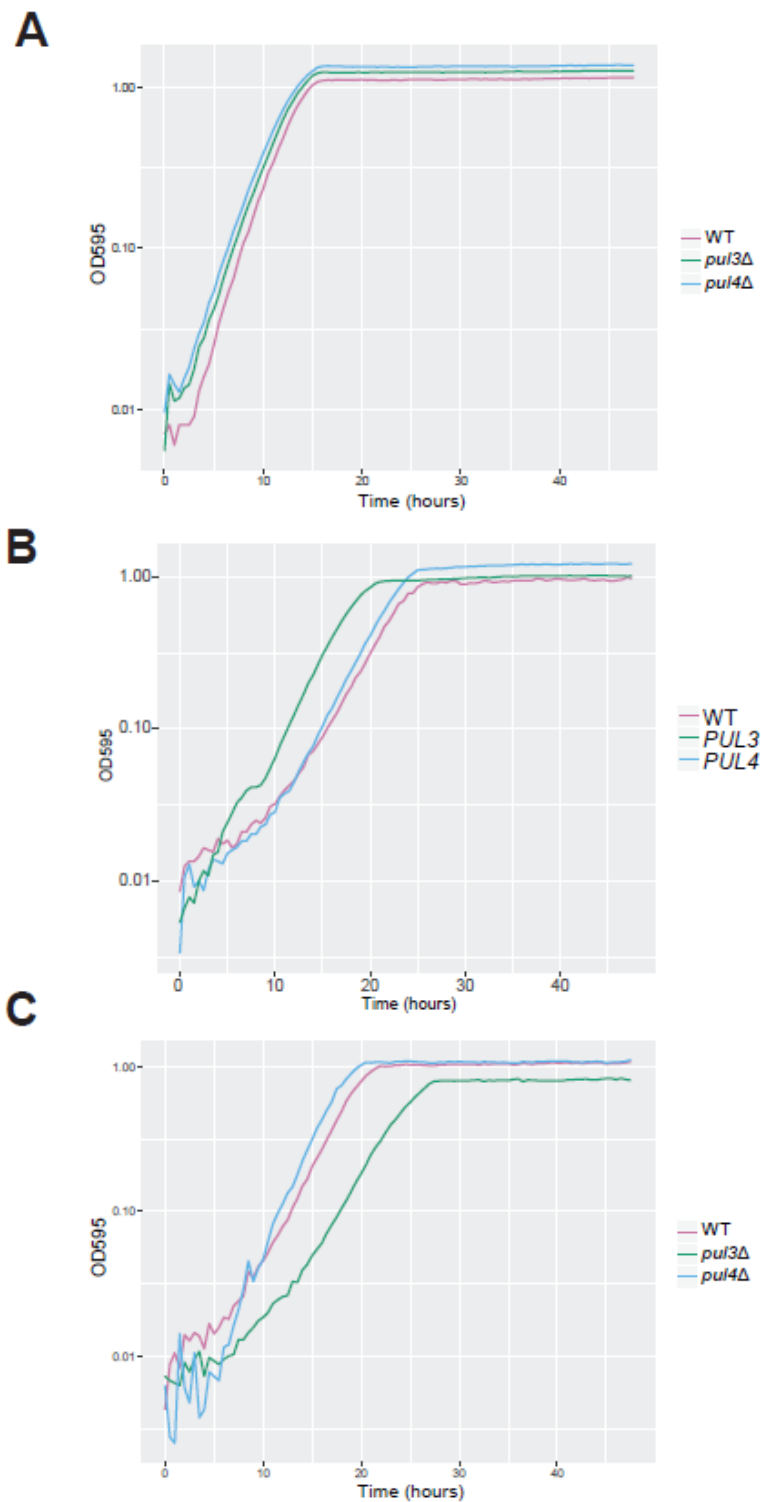

Figure S7 – A) Representative growth curves of *S. cerevisiae pul* mutants in synthetic complete medium without addition of pulcherrimic acid. B) Growth of complemented *S. cerevisiae pul* mutants in synthetic complete medium with addition of pulcherrimic acid. C) Growth of *S. cerevisiae pul* mutants in PA-treated medium, with addition of FeCl<sub>3</sub>.

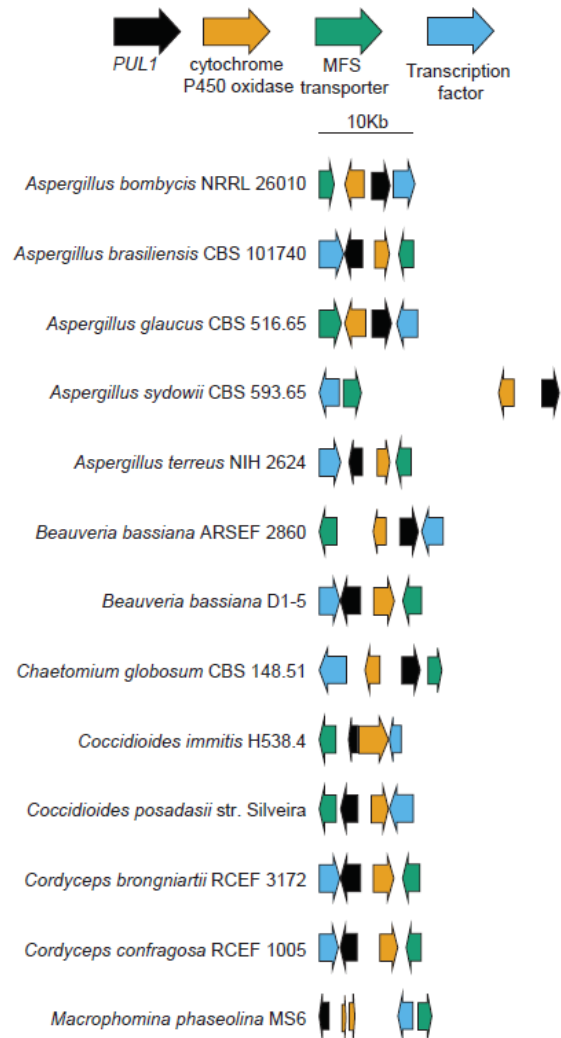

Figure S8 - Gene arrow diagrams of *PULcherrimin* gene clusters in filamentous fungi and basidiomycetes. Gene neighborhoods of *PUL1* homologs that contained genes with similarity to a cytochrome P450 oxidase, MFS transporter, and transcription factor are shown.

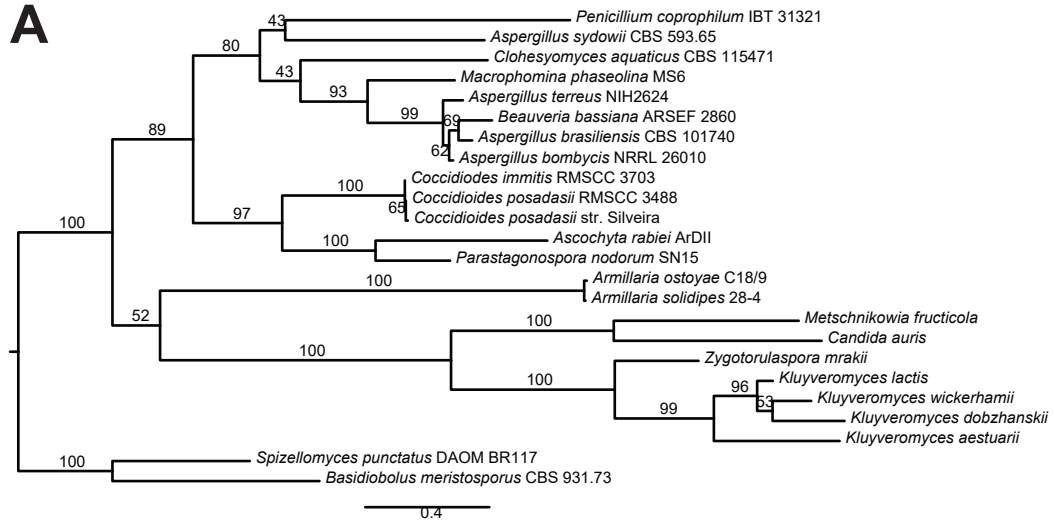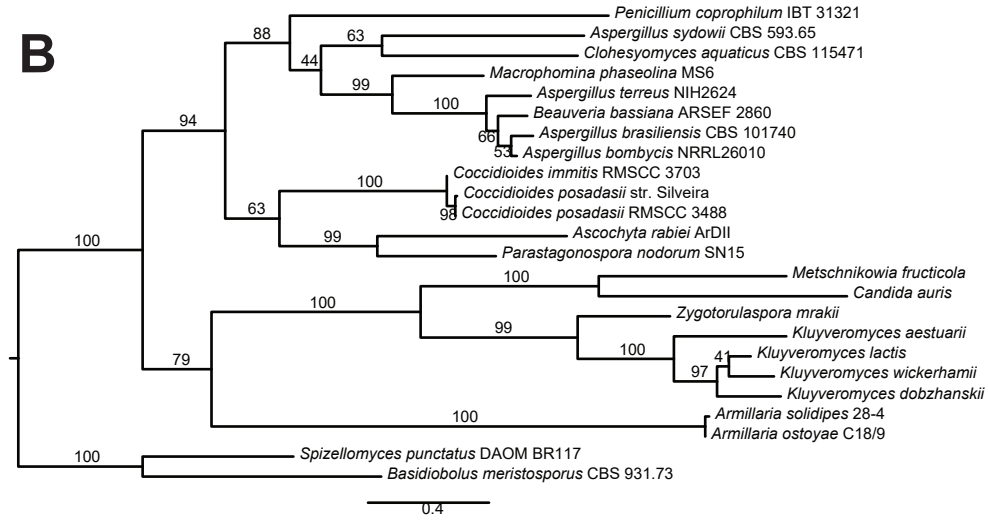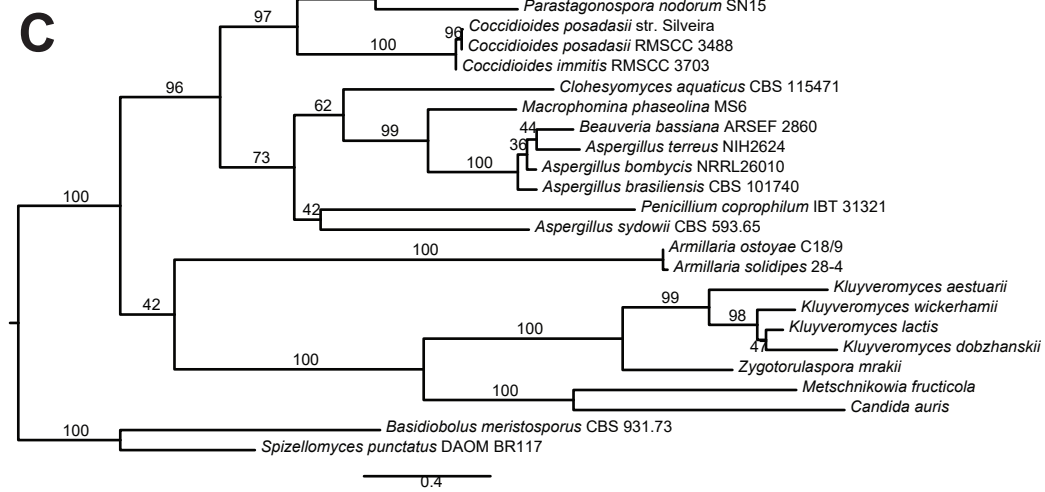

Figure S9– Gene trees for *PUL1* and homologs. Trees were rooted on branches leading to a basidiomycetous homolog for each gene. Bootstrap values for 1000 replicates shown. A) MAFFT alignment, B) MUSCLE alignment, C) T-Coffee alignment.

**A**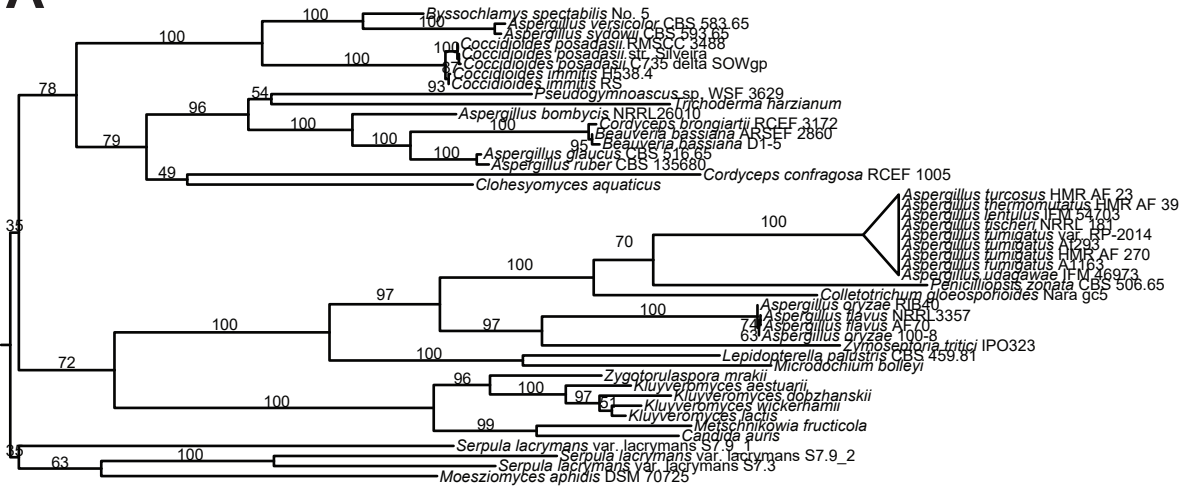**B**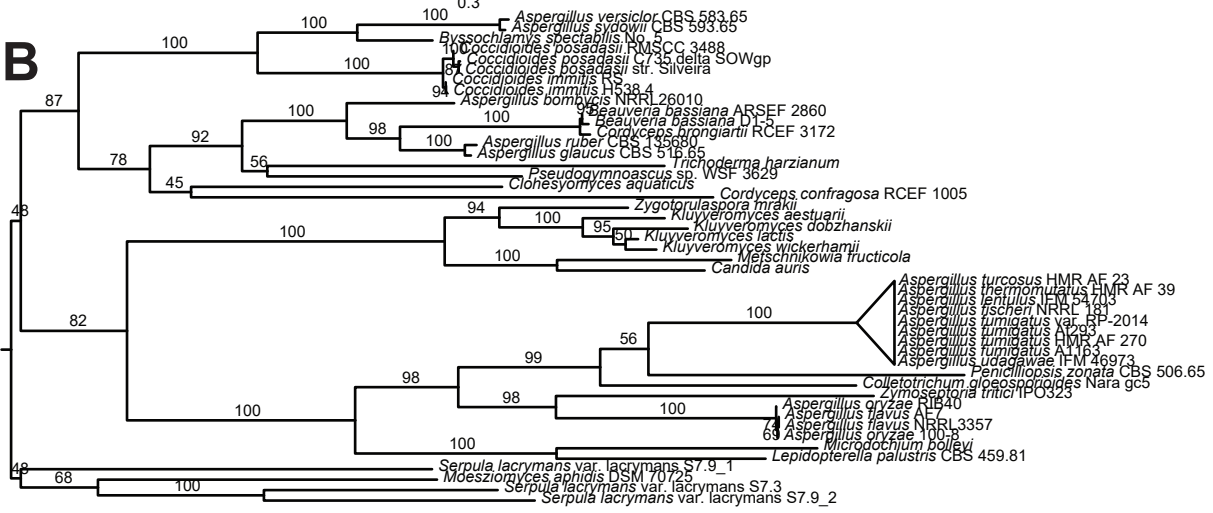**C**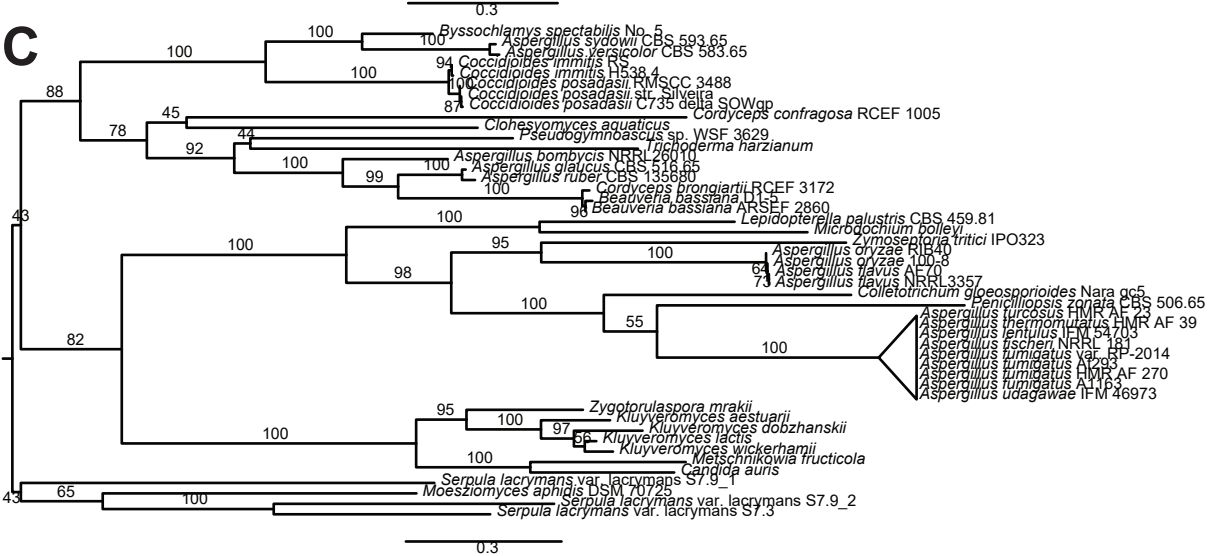

Figure S10 – Gene trees for *PUL2* and homologs. Trees were rooted on branches leading to a basidiomycetous homolog for each gene. Bootstrap values for 1000 replicates shown. A) MAFFT alignment, B) MUSCLE alignment, C) T-Coffee alignment. The *Aspergillus turcosus/Aspergillus thermomutatus/Aspergillus lentulus/Aspergillus fischeri/Aspergillus fumigatus/Aspergillus udagawae* clade had short branch lengths and poor bootstrap support, so it was collapsed for easier viewing.

**A**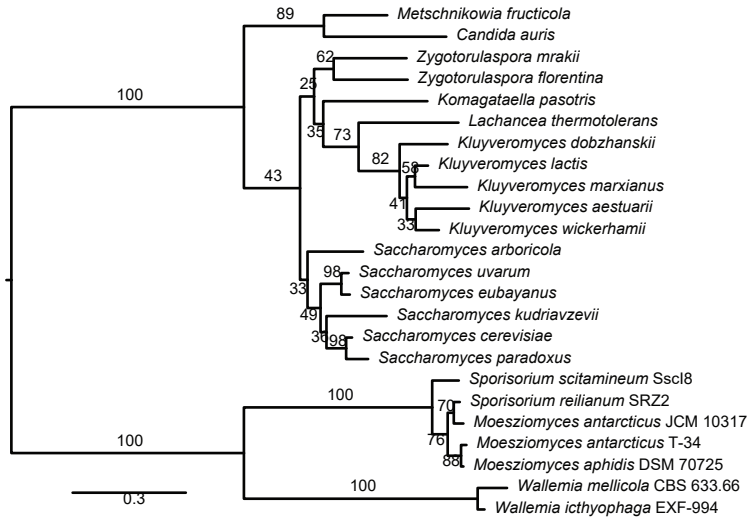**B**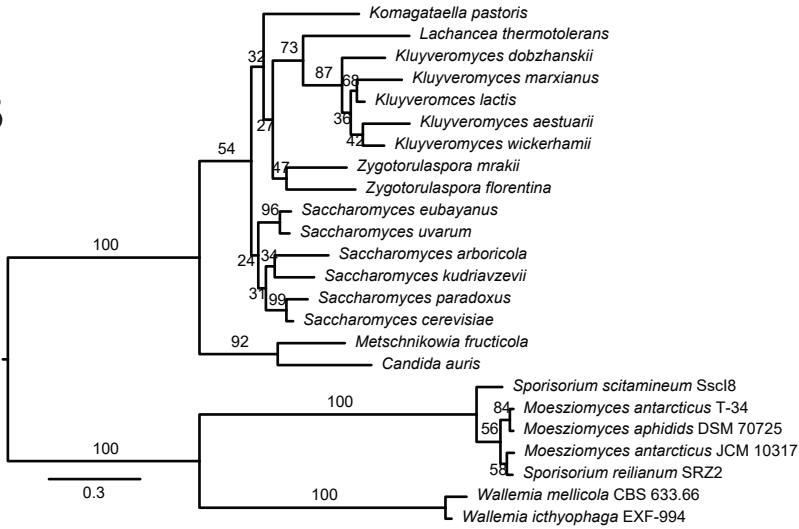**C**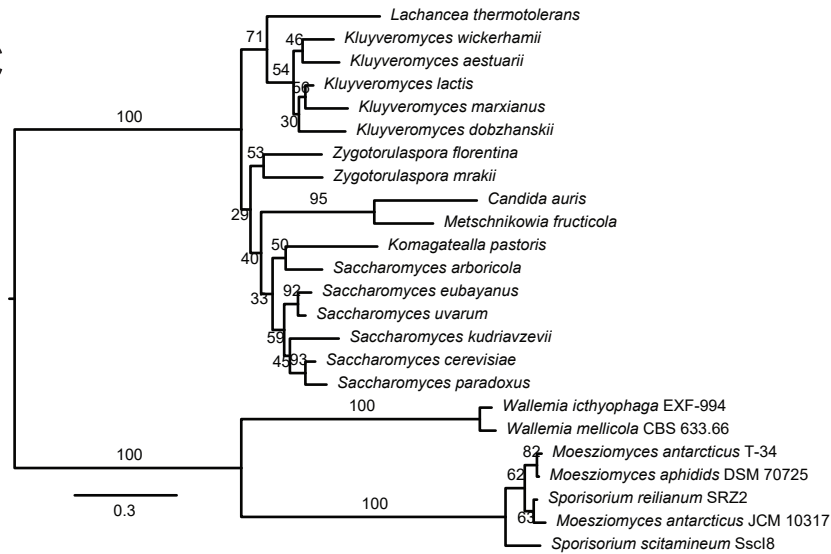



Figure S11 – Gene trees for *PUL3* and homologs. Trees were rooted on branches leading to a basidiomycetous homolog for each gene. Bootstrap values for 1000 replicates shown. A) MAFFT alignment, B) MUSCLE alignment, C) T-Coffee alignment.

**A**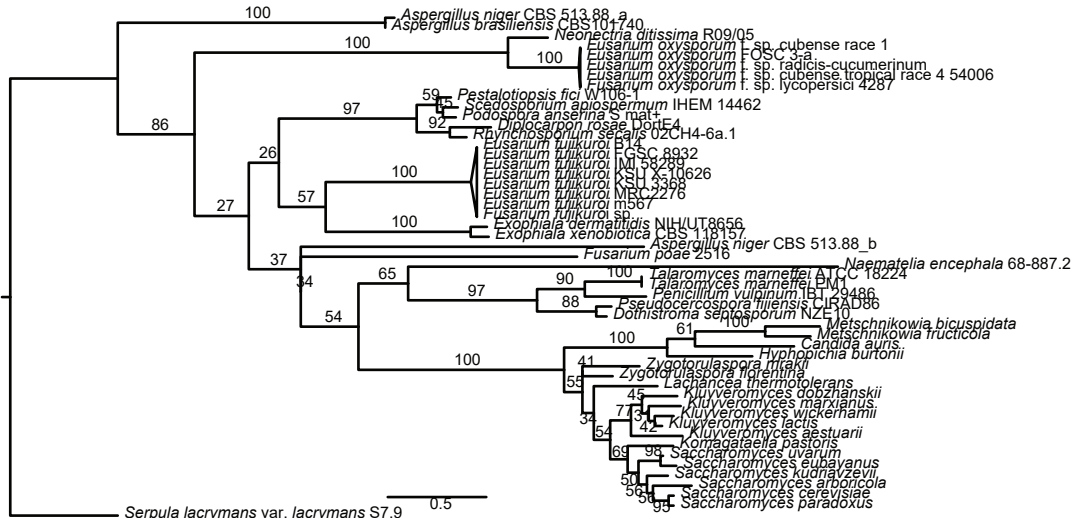**B**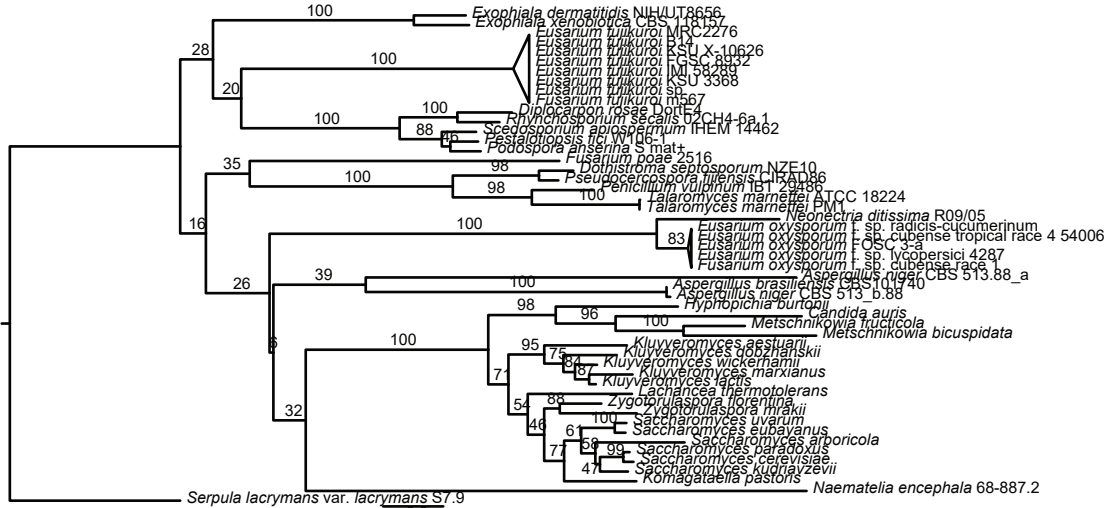**C**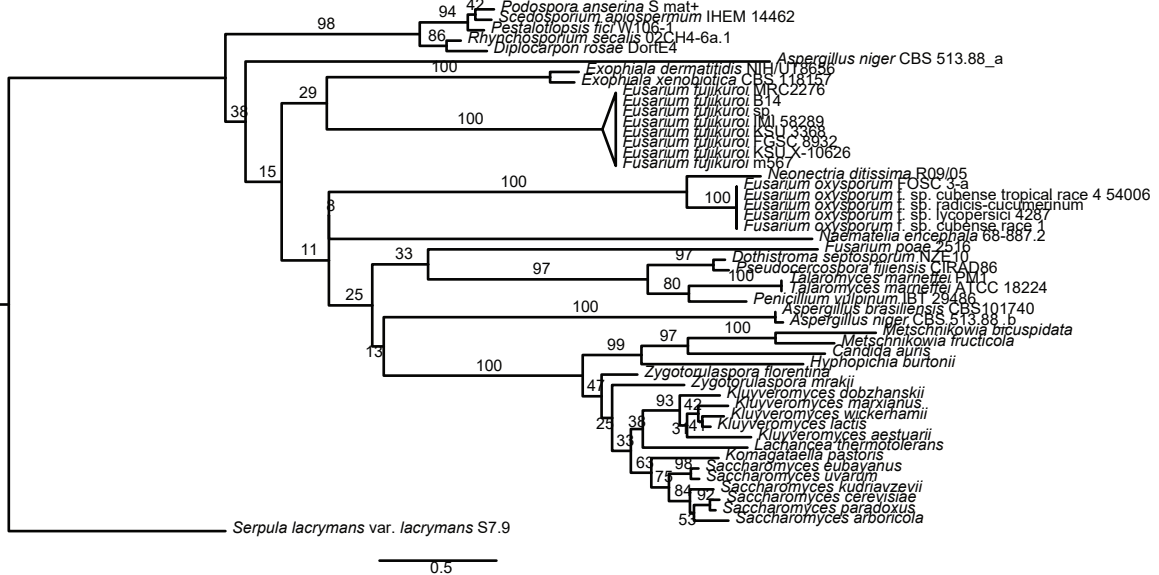

Figure S12 – Gene trees for *PULA* and homologs. Trees were rooted on branches leading to a basidiomycetous homolog for each gene. Bootstrap values for 1000 replicates shown. A) MAFFT alignment, B) MUSCLE alignment, C) T-Coffee alignment. The *Fusarium fujikuroi* clade and the *Fusarium oxysporum* clade were collapsed for ease of viewing due to short branch lengths and poor bootstrap support.

Table S1 – Yeast strains and plasmids used in this study

| Strain                                                         | Genotype, properties                                                                                                                   | Source or reference          |
|----------------------------------------------------------------|----------------------------------------------------------------------------------------------------------------------------------------|------------------------------|
| <b><i>Kluyveromyces lactis</i></b>                             |                                                                                                                                        |                              |
| CBS2359 <i>ku80</i> Δ                                          | <i>MATa ku80</i> Δ; NHEJ-deficient strain for efficient gene targeting                                                                 | Kooistra <i>et al.</i> 2004  |
| <i>pul1</i> Δ (yHDK46)                                         | <i>MATa ku80</i> -Δ <i>pul1</i> Δ:: <i>KanMX4</i>                                                                                      | This study                   |
| <i>pul2</i> Δ (yHDK49)                                         | <i>MATa ku80</i> -Δ <i>pul2</i> Δ:: <i>KanMX4</i>                                                                                      | This study                   |
| <i>pul3</i> Δ (yHDK61)                                         | <i>MATa ku80</i> -Δ <i>pul3</i> Δ:: <i>KanMX4</i>                                                                                      | This study                   |
| <i>pul4</i> Δ (yHDK58)                                         | <i>MATa ku80</i> -Δ <i>pul4</i> Δ:: <i>KanMX4</i>                                                                                      | This study                   |
| <i>pul1</i> Δ; <i>PUL1</i> (yHDK81)                            | <i>MATa ku80</i> -Δ <i>pul1</i> Δ:: <i>KanMX4</i><br><i>ura3</i> Δ:: <i>PUL1</i>                                                       | This study                   |
| <i>pul2</i> Δ; <i>PUL2</i> (yHDK55)                            | <i>MATa ku80</i> -Δ <i>pul2</i> Δ:: <i>KanMX4</i><br><i>ura3</i> Δ:: <i>PUL2</i>                                                       | This study                   |
| <i>pul3</i> Δ; <i>PUL3</i> (yHDK82)                            | <i>MATa ku80</i> -Δ <i>pul3</i> Δ:: <i>KanMX4</i><br><i>ura3</i> Δ:: <i>PUL3</i>                                                       | This study                   |
| <i>pul4</i> Δ; <i>PUL4</i> (yHDK85)                            | <i>MATa ku80</i> -Δ <i>pul4</i> Δ:: <i>KanMX4</i><br><i>ura3</i> Δ:: <i>PUL4</i>                                                       | This study                   |
| <i>pul1</i> Δ <i>pul3</i> Δ (yHDK105)                          | <i>MATa ku80</i> -Δ <i>pul1</i> Δ:: <i>HygMX</i><br><i>pul3</i> Δ:: <i>KanMX4</i>                                                      | This study                   |
| <i>pul1</i> Δ <i>ura3</i> -Δ [ <i>pIL68-PUL2</i> ] (yHDK218)   | <i>MATa ku80</i> -Δ <i>ura3</i> -Δ <i>pul1</i> Δ:: <i>HygMX</i><br>[ <i>pIL68-URA3-P<sub>EgTEF1</sub>-PUL2-T<sub>EgTEF1</sub></i> ]    | This study                   |
| <i>pul2</i> Δ <i>ura3</i> -Δ [ <i>pIL68-PUL1</i> ] (yHDK221)   | <i>MATa ku80</i> -Δ <i>ura3</i> -Δ <i>pul2</i> Δ:: <i>KanMX4</i><br>[ <i>pIL68-URA3-P<sub>EgTEF1</sub>-PUL1-T<sub>EgTEF1</sub></i> ]   | This study                   |
| <i>pul4</i> Δ <i>ura3</i> -Δ [ <i>pIL68-PUL1</i> ] (yHDK224)   | <i>MATa ku80</i> -Δ <i>ura3</i> -Δ <i>pul4</i> Δ:: <i>KanMX4</i><br>[ <i>pIL68-URA3-P<sub>EgTEF1</sub>-PUL1-T<sub>EgTEF1</sub></i> ]   | This study                   |
| <i>pul4</i> Δ <i>ura3</i> -Δ [ <i>pIL68-PUL2</i> ] (yHDK227)   | <i>MATa ku80</i> -Δ <i>ura3</i> -Δ <i>pul4</i> Δ:: <i>KanMX4</i><br>[ <i>pIL68-URA3-P<sub>EgTEF1</sub>-PUL2-T<sub>EgTEF1</sub></i> ]   | This study                   |
| <i>pul1</i> Δ <i>ura3</i> -Δ [ <i>pIL68-BsyvmC</i> ] (yHDK230) | <i>MATa ku80</i> -Δ <i>ura3</i> -Δ <i>pul1</i> Δ:: <i>HygMX</i><br>[ <i>pIL68-URA3-P<sub>EgTEF1</sub>-BsyvmC-T<sub>EgTEF1</sub></i> ]  | This study                   |
| <i>pul2</i> Δ <i>ura3</i> -Δ [ <i>pIL68-BscypX</i> ] (yHDK233) | <i>MATa ku80</i> -Δ <i>ura3</i> -Δ <i>pul2</i> Δ:: <i>KanMX4</i><br>[ <i>pIL68-URA3-P<sub>EgTEF1</sub>-BscypX-T<sub>EgTEF1</sub></i> ] | This study                   |
| <b><i>Saccharomyces cerevisiae</i></b>                         |                                                                                                                                        |                              |
| BY4741                                                         | <i>MATa his3</i> Δ1 <i>leu2</i> Δ0 <i>met15</i> Δ0 <i>ura3</i> Δ0                                                                      | Brachmann <i>et al.</i> 1998 |
| <i>pul3</i> Δ (yHDK52)                                         | <i>MATa his3</i> -Δ1 <i>leu2</i> -Δ0 <i>met15</i> -Δ0 <i>ura3</i> -Δ0<br><i>pul3</i> Δ:: <i>KanMX4</i>                                 | This study                   |
| <i>pul3</i> Δ [ <i>pRS426</i> ] (yHDK64)                       | <i>MATa his3</i> -Δ1 <i>leu2</i> -Δ0 <i>met15</i> -Δ0 <i>ura3</i> -Δ0<br><i>pul3</i> Δ:: <i>KanMX4</i> [ <i>pRS426-URA3</i> ]          | This study                   |
| <i>pul3</i> Δ [ <i>pRS426-PUL3</i> ] (yHDK91)                  | <i>MATa his3</i> -Δ1 <i>leu2</i> -Δ0 <i>met15</i> -Δ0 <i>ura3</i> -Δ0<br><i>pul3</i> Δ:: <i>KanMX4</i> [ <i>pRS426-PUL3-URA3</i> ]     | This study                   |
| <i>pul4</i> Δ (yHDK54)                                         | <i>MATa his3</i> -Δ1 <i>leu2</i> -Δ0 <i>met15</i> -Δ0 <i>ura3</i> -Δ0<br><i>pul4</i> Δ:: <i>KanMX4</i>                                 | This study                   |
| <i>pul4</i> Δ [ <i>pRS426</i> ] (yHDK67)                       | <i>MATa his3</i> -Δ1 <i>leu2</i> -Δ0 <i>met15</i> -Δ0 <i>ura3</i> -Δ0<br><i>pul4</i> Δ:: <i>KanMX4</i> [ <i>pRS426-URA3</i> ]          | This study                   |
| <i>pul4</i> Δ [ <i>pRS426-PUL4</i> ] (yHDK87)                  | <i>MATa his3</i> -Δ1 <i>leu2</i> -Δ0 <i>met15</i> -Δ0 <i>ura3</i> -Δ0<br><i>pul4</i> Δ:: <i>KanMX4</i> [ <i>pRS426-PUL4-URA3</i> ]     | This study                   |

Plasmids

pUG6  
pRS426  
pIL68

*KanMX4*, Amp<sup>R</sup>  
*S. cerevisiae URA3*, Amp<sup>R</sup>  
*S. cerevisiae URA3*, Amp<sup>R</sup>, *K. lactis* ARS

Güldener *et al.* 1996  
Sikorski and Hieter 1989  
Liachko and Dunham  
2014

Oligo Name            Sequence

---

Amplification of the *KanMX4* cassette for OEPCR

oHRW36            5'-CAGCGACATGGAGGCCAAGAATACCC-3'

oHRW37            5'-AGCTCGTTTTTCGACACTGGATGGCG-3'

---

Amplification of flanking sequence to *KIPUL1* for replacement with *KanMX4*

oHDK56            5'-TGAACACGCTATGCATCAATTTGACAA-3'

oHDK57            5'-GGGTATTCTGGGCCTCCATGTCGCTGTTTTAATTTTCTTGGTGCATGCCATCG-3'

oHDK75            5'-CGCCATCCAGTGTCGAAAACGAGCTTAACTAATATTTTTGCCTAGAATCTATATACCA-3'

oHDK76            5'-GTGCTCTGCTGTGATTTCTTCTCGACT-3'

---

Amplification of flanking sequence to *KIPUL2* for replacement with *KanMX4*

oHDK77            5'-CGGTTTGAGGTTATTGTAAAAGACAGG-3'

oHDK78            5'-GGGTATTCTGGGCCTCCATGTCGCTGTTCTTTCCTGTTGCGCTTCAATTGTC-3'

oHDK58            5'-CGCCATCCAGTGTCGAAAACGAGCTGAAATTTTTTTGAAAGTCTGTGTTGAA-3'

oHDK64            5'-ATTGAAGAACGAATGAGCACCTGAAG-3'

---

Amplification of flanking sequence to *KIPUL3* for replacement with *KanMX4*

oHDK113           5'-ATAGTTTGCCAACTGCATCGAATG-3'

oHDK114           5'-GGGTATTCTGGGCCTCCATGTCGCTGTGTTAGCCTTTTGTCTTATCAGGT-3'

oHDK115           5'-CGCCATCCAGTGTCGAAAACGAGCTAGGCAATAAAAAGTAGCACCTGATGT-3'

oHDK116            5'-CCGTGACACCAAAGGAATTTTTTCC-3'

---

Amplification of flanking sequence to *KIPUL4* for replacement with *KanMX4*

oHDK121            5'-TATATCCAATTCGGTATCTAGGGAGTGA-3'

oHDK122            5'-GGGTATTCTGGGCCTCCATGTCGCTGCAATCAAATGTGCTACACCTAATGTTAGAT-3'

oHDK123            5'-CGCCATCCAGTGTCGAAAACGAGCTTCGGACAGCATAACAATTATCATCGATTTA-3'

oHDK124            5'-CAAATCGCACCCAGAGAGCTGACT-3'

---

Amplification of the deleted loci for confirmation

oHDK60             5'-AAAACCTCGAGGGTGGAAAGTACTTCTAAAAAAACC-3'

oHDK79             5'-AAAAGCGGCCGCTTCTTTCCTGTTGCGCTTCAA-3'

oHDK61             5'-TTTTGCGGCCGCTCAATCAAATGTGCTACACCTAATA-3'

oHDK80             5'-AAAACCTCGAGTAACTAATATTTTTGCCTAGAATCTATA-3'

oHDK117            5'-ACAGATCTATATTCAATAAGGTTGCAAAGACT-3'

oHDK118            5'-AAATCTGTTGACTGCGTCAGATTGATTTTAC-3'

oHDK125            5'-GACTGCCTAATCTTTTCTTTTAGTCG-3'

oHDK126            5'-CATTTTCAAGACGCCAATGTTAGTGA-3'

---

Amplification of loci for integration into *URA3* of *K. lactis*

oHDK97             5'-TACACACATTACTTGCCTCGA-3'

oHDK98             5'-GTTCTATTAAGTTTCTGTATAAGGTGCAACTAATTGACGGGA-3'

oHDK99 5'-TCCCGTCAATTAGTTGCACCTTATACAGGAACTTAATAGAACAAATCAC-3'  
oHDK100 5'-AGGAAGTTTGAGAGGGCTTATCG-3'  
oHDK101 5'-GGTGCAACTAATTGACGGGAG-3'  
oHDK102 5'-TTATACAGGAACTTAATAGAACAAATCAC-3'  
oHDK103 5'-GCGTCAATACACTCCCGTCAATTAGTTGCACCTAACTAATATTTTTGCCTAGAATCTATA-3'  
oHDK104 5'-AAATATGTGATTTGTTCTATTAAGTTTCCTGTATAATCAATCAAATGTGCTACACCTAAT-3'  
oHDK105 5'-GCGTCAATACACTCCCGTCAATTAGTTGCACCGGTGGAAGTACTTCTAAAAAAACC-3'  
oHDK106 5'-AAATATGTGATTTGTTCTATTAAGTTTCCTGTATAATTCTTTTCCTGTTGCGCTTCAA-3'  
oHDK119 5'-GCGTCAATACACTCCCGTCAATTAGTTGCACCTCGGACAGCATAACAATTATCATC-3'  
oHDK120 5'-AAATATGTGATTTGTTCTATTAAGTTTCCTGTATAATATAAAGCAATCCTGGCAATTTAA-3'  
oHDK127 5'-GCGTCAATACACTCCCGTCAATTAGTTGCACCGAAATTTTTTTGAAAGTCTGTGTTGA-3'  
oHDK128 5'-AAATATGTGATTTGTTCTATTAAGTTTCCTGTATAATTGTTAGCCTTTTGTTCCTATCAG-3'

---

Amplification of *URA3* locus for confirmation

oHDK129 5'-TACGGAGACAATCATATGGGAGAAGCAATTGGA-3'  
oHDK130 5'-TCTTGTTGTTCCCTTACCATTAAGTTGATCCATTG-3'

---

Amplification of *KanMX4* for replacement of *PUL3* in *S. cerevisiae*

oHDK81 5'-TGCAGCATCTGCTTCTGGTGCTATAGTGTTTCAGTTACATCCAGCTGAAGCTTCGTACGC-3'  
oHDK82 5'-ATATATAGCTGGATTTGGACCAGTATATGTCTAAGGAAATGCATAGGCCACTAGTGGATC-3'

---



---

Amplification of *KanMX4* for replacement of *PUL4* in *S. cerevisiae*

oHDK83            5'-AGCTTAATCTAAAAC TACAAAAGCGTTCGCAACAAGCAGTCAGCTGAAGCTTCGTACGC-3'  
oHDK84            5'-ATTTCTGAATAAAGTGTCAAAAAATCAGCTAGGAAACGGTGCATAGGCCACTAGTGGATC-3'

---

Confirmation of *PUL3* and *PUL4* loci in *S. cerevisiae*

oHDK85            5'-GTATTCATGCGGCGGTGCAGTGT-3'  
oHDK86            5'-AAAAGAGGCTGACTTTTTGTCGTCCAAG-3'  
oHDK87            5'-TGTCATCTAAGATTCAATTAAGTCGAC-3'  
oHDK88            5'-CCTACTACCATGTCATATGGATCT-3'

---

Amplification of *PUL3* and *PUL4* loci for gap repair into pRS426

oHDK89            5'-AGCGCGCGTAATACGACTCACTATAGGGCGAATTGGGTACGAACGCTTTTGTAGTTTTAG-3'  
oHDK90            5'-CCAAGCGCGCAATTAACCCTCACTAAAGGGAACAAAAGCTGGTAACAAAATATCAAGCTG-3'  
oHDK91            5'-AGCGCGCGTAATACGACTCACTATAGGGCGAATTGGGTACGATGTAAC TGAACACTATAG-3'  
oHDK92            5'-CCAAGCGCGCAATTAACCCTCACTAAAGGGAACAAAAGCTAGATACTAAGTTCTTGTGAC-3'

---

Screening pRS426 and pIL68 for proper insertions

M13F              5'-CCCAGTCACGACGTTGTAAAACG-3'  
M13R              5'-AGCGGATAACAATTTACACACAGG-3'

---

Cloning *PUL1* and *PUL2* with *EgTEF1* promoter and terminator into pIL68

oHDK243           5'-CGACGGTATCGATAAGCTTGATATCGAATTCCTGCAGCCCAGATCTGTTT TAGCTTGCCTC-3'

oHDK244 5'- CCACCGCGGTGGCGGCCGCTCTAGAACTAGTGGATCCCCCTCGACACTGGATGGCGGCGT-3'  
oHDK167 5'- GGATACAGTTCTCACATCACATCCGAACATAAACAACCATGTACCAACTGCTTTTCCA-3'  
oHDK168 5'- AAGTTCTTGAAAACAAGAATCTTTTTATTGTCAGTACTGATCAGATTACGAGAGCACCAT-3'  
oHDK169 5'- GGATACAGTTCTCACATCACATCCGAACATAAACAACCATGTTAGCTGATATATTAATCC-3'  
oHDK170 5'- AAGTTCTTGAAAACAAGAATCTTTTTATTGTCAGTACTGATCACAATGCAGTTAGTTGAA-3'

---

Cloning *BsymC* and *BscypX* with *EgTEF1* promoter and terminator into pIL68

oHDK226 5'- CAGTTCTCACATCACATCCGAACATAAACAACCATGACCGGAATGGTAACGGAAAGAAGG-3'  
oHDK227 5'- TGAAAACAAGAATCTTTTTATTGTCAGTACTGATCATCCTTCAGATGTGATCCGTTTCTC-3'  
oHDK259 5'- CACATCACATCCGAACATAAACAACCATGAGCCAATCGATTAAATTGTTTAGTGTGCTTT-3'  
oHDK260 5'- AAACAAGAATCTTTTTATTGTCAGTACTGATTATGCCCCGTCAAACGCAACGAG-3'

Table S3 – Topology tests of the *PUL* gene trees.

| Gene        | Alignment program | Trimmed alignment length | One-sided KH test <i>p</i> -value | AU test <i>p</i> -value |
|-------------|-------------------|--------------------------|-----------------------------------|-------------------------|
| <i>PUL1</i> | MAFFT             | 321                      | 0.50                              | 1.0                     |
|             | MUSCLE            | 377                      | 0.49                              | 0.99                    |
|             | T-Coffee          | 356                      | 0.51                              | 1.0                     |
| <i>PUL2</i> | MAFFT             | 353                      | 0.51                              | 0.93                    |
|             | MUSCLE            | 390                      | 0.51                              | 0.92                    |
|             | T-Coffee          | 366                      | 0.51                              | 0.92                    |
| <i>PUL3</i> | MAFFT             | 199                      | 0.015                             | 0.083                   |
|             | MUSCLE            | 238                      | 0.14                              | 0.06                    |
|             | T-Coffee          | 217                      | 0.096                             | 0.084                   |
| <i>PUL4</i> | MAFFT             | 144                      | 0.016                             | 0.076                   |
|             | MUSCLE            | 342                      | 0.078                             | 0.22                    |
|             | T-Coffee          | 250                      | 0.15                              | 0.25                    |

We tested for HGT within the subphylum by using one-sided Kishino-Hasegawa (KH) tests for significant differences between likelihood values for two trees constructed from the same gene alignment: in our case the likelihoods of the ML gene tree and a tree constrained by the genome-wide species topology (Figure 1). This type of test is generally very liberal: when tests fail to meet the *p*-value threshold, there is no statistically significant difference between the likelihood values of the two trees, and we conclude the GW tree is as good a representation of the data as the gene tree, but tests exceeding the *p*-value threshold do not necessarily indicate significant differences. We further used the Approximately Unbiased (AU) test to assess the likelihood distribution of a large set of reasonable alternative topologies to the ML tree, including all possible arrangements of the genera analyzed for each gene tree. For the 12 alignments tested, we used a Bonferroni-corrected *p*-value cutoff of  $4.1 \times 10^{-3}$ , and none of the alignments for either test met this threshold, meaning that the genome-wide inferred topology cannot be rejected as a possible representation of the data. We reason that phylogenetic incongruences in the *PUL3* and *PUL4* trees within the Saccharomycotina are more likely to be explained by the result of convergent selective regimes in the conserved, well-aligned regions of the genes.

## SI References

1. Kooistra R, Hooykaas PJJ, Steensma HY (2004) Efficient gene targeting in *Kluyveromyces lactis*. *Yeast* **21**:781–792.
2. Hittinger CT, Carroll SB (2007) Gene duplication and the adaptive evolution of a classic genetic switch. *Nature* **449**:nature06151.
3. Brachmann CB, et al. (1998) Designer deletion strains derived from *Saccharomyces cerevisiae* S288C: a useful set of strains and plasmids for PCR-mediated gene disruption and other applications. *Yeast* **14**:115–132.
4. Güldener U, Heck S, Fielder T, Beinhauer J, Hegemann JH (1996) A new efficient gene disruption cassette for repeated use in budding yeast. *Nucleic Acids Res* **24**:2519–2524.
5. Liachko I, Dunham MJ (2014) An Autonomously Replicating Sequence for use in a wide range of budding yeasts. *FEMS Yeast Res* **14**:364–367.
6. Gietz RD, Schiestl RH (2007) High-efficiency yeast transformation using the LiAc/SS carrier DNA/PEG method. *Nat Protoc* **2**:31–34.
7. Christianson TW, Sikorski RS, Dante M, Shero JH, Hieter P (1992) Multifunctional yeast high-copy-number shuttle vectors. *Gene* **110**:119–122.
8. Kluyver AJ, van der Walt JP, van Triet AJ (1953) Pulcherrimin, the pigment of *Candida Pulcherrima*. *Proc Natl Acad Sci USA* **39**:583–593.
9. Sylvester K, et al. (2015) Temperature and host preferences drive the diversification of *Saccharomyces* and other yeasts: a survey and the discovery of eight new yeast species. *FEMS Yeast Res* **15**: doi:10.1093/femsyr/fov002.
10. grofit: fitting biological growth curves with R | Kahm | Journal of Statistical Software doi:10.18637/jss.v033.i07.
11. Wickham H (2009) *Ggplot2: Elegant Graphics for Data Analysis* (Springer Publishing Company, Incorporated).
- 12 Shannon P, et al. (2003) Cytoscape: a software environment for integrated models of biomolecular interaction networks. *Genome Res* **13**:2498–2504.
13. Kozlov AM, Aberer AJ, Stamatakis A (2015) ExaML version 3: a tool for phylogenomic analyses on supercomputers. *Bioinforma Oxf Engl* **31**:2577–2579.
14. Katoh K, Standley DM (2013) MAFFT Multiple Sequence Alignment Software Version 7: Improvements in Performance and Usability. *Mol Biol Evol* **30**:772–780.
15. Edgar RC (2004) MUSCLE: multiple sequence alignment with high accuracy and high throughput. *Nucleic Acids Res* **32**:1792–1797.
16. Notredame C, Higgins DG, Heringa J (2000) T-Coffee: A novel method for fast and accurate multiple sequence alignment. *J Mol Biol* **302**:205–217.
17. Capella-Gutiérrez S, Silla-Martínez JM, Gabaldón T (2009) trimAl: a tool for automated alignment trimming in large-scale phylogenetic analyses. *Bioinformatics* **25**:1972–1973.

18. Stamatakis A (2014) RAxML version 8: a tool for phylogenetic analysis and post-analysis of large phylogenies. *Bioinforma Oxf Engl* **30**:1312–1313.
19. Rambaut A, Drummond A (2009) FigTree v1. 3.1.
20. Goldman N, Anderson JP, Rodrigo AG, Olmstead R (2000) Likelihood-based tests of topologies in phylogenetics. *Syst Biol* **49**:652–670.
21. Shimodaira H, Hasegawa M (2001) CONSEL: for assessing the confidence of phylogenetic tree selection. *Bioinformatics* **17**:1246–1247.
